# Supplementary material for: Incipient sympatric speciation in Midas cichlid fish from the youngest and one of the smallest crater lakes in Nicaragua due to differential use of the benthic and limnetic habitats?
Source: PubMed Central journal article supplement (PMC4984508; doi:10.1002/ece3.2287), 2016-07-01

div\_nomig

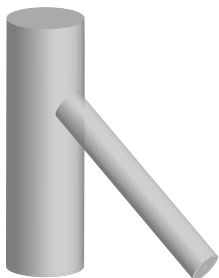

div

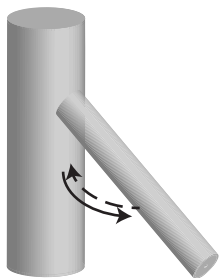

GL-bottlegrowth\_div

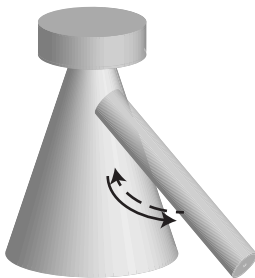

GL-bottlegrowth\_div\_CL-change

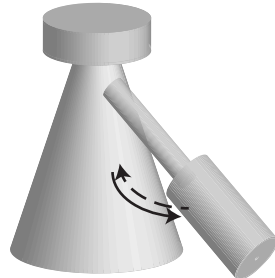

GL-bottlegrowth\_div\_CL-growth

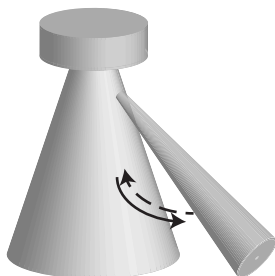

GL-bottlegrowth\_div\_CL-recentgrowth

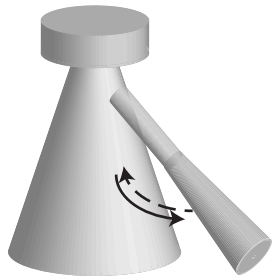

GL-bottlegrowth\_div\_CL-pastgrowth

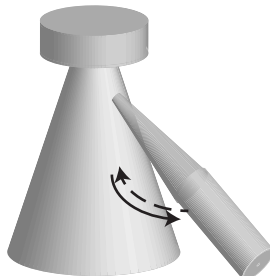

GL-bottlegrowth\_div\_CL-growth\_admix

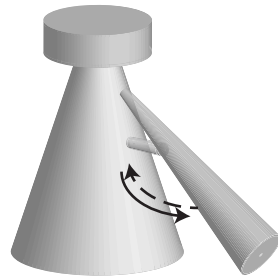

div\_GL-bottlegrowth\_CL-growth\_admix

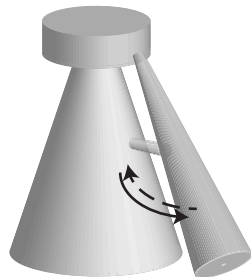

div\_GL-bottlegrowth\_CL-growth\_admix\_noinGLmig

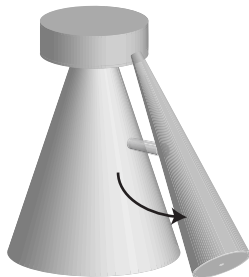

GL-bottlegrowth\_div\_CL-growth\_admix\_nomig

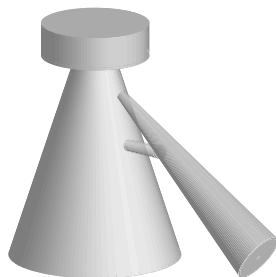

GL-bottlegrowth\_div\_CL-growth\_admix\_noinGLmig

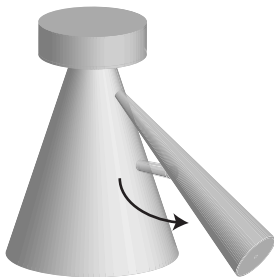

GL-bottlegrowth\_div\_CL-growth\_admix\_noinCLmig

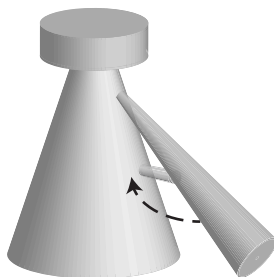

Supplement: ECE3-6-5342-s002.pdf [file ECE3-6-5342-s002.pdf]
