# Supplementary material for: Incipient sympatric speciation in Midas cichlid fish from the youngest and one of the smallest crater lakes in Nicaragua due to differential use of the benthic and limnetic habitats?
Source: PubMed Central journal article supplement (PMC4984508; doi:10.1002/ece3.2287), 2016-07-01

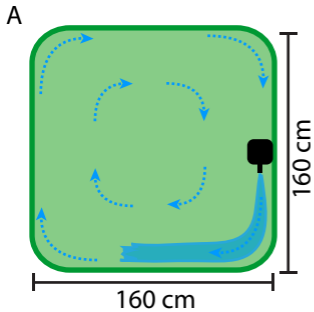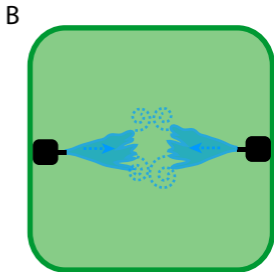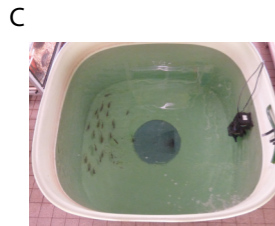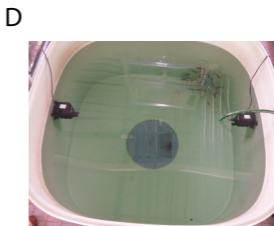

Supplement: ECE3-6-5342-s001.pdf [file ECE3-6-5342-s001.pdf]
